# Supplementary material for: The root-knot nematode Meloidogyne incognita produces a functional mimic of the Arabidopsis INFLORESCENCE DEFICIENT IN ABSCISSION signaling peptide
Source: PubMed Central journal article supplement (PMC5972575; doi:10.1093/jxb/ery135), 2018-04-10
Supplement: ery135_suppl_supplementary-table_s1.pdf [file ery135_suppl_supplementary-table_s1.pdf]

**Supplementary Table S1.** Accession numbers or nucleotide and protein sequence for the gene motifs used in the dendrogram in Figure 1. Sequences without an accession number were identified by us in genomic and EST sequences and tested for expression by qPCR (Tucker and Yang, 2012, 2013).

| Name in Fig. 1 | Nucleotide Accession | Protein Accession | Other              |
|----------------|----------------------|-------------------|--------------------|
| AtCLE41        | NM_113389.1          | NP_566754.1       | AT3G24770          |
| AtCLV3         | NM_001124926.1       | NP_001118398      | AT2G27250.3        |
| AtIDA          | NM_105550.1          | NP_564941         | At1G68765          |
| AtIDL1         | NM_113464.2          | NP_566774.1       | At3G25655          |
| AtIDL2         | NM_001085327.2       | NP_001078796.1    | At5G64667          |
| AtIDL3         | NM_001085091.1       | NP_001078560.1    | At5G09805          |
| AtIDL4         | NM_001084711.1       | NP_001078180.1    | At3G18715          |
| AtIDL5         | NM_001084366.2       | NP_001077835.2    | At1G76952          |
| AtIDL6         | NM_001342808.1       | NP_001318482.1    | At5G05300          |
| AtIDL7         | AC009991.5           | AAF01528.1        | At3G10930          |
| AtIDL8         | AK221754.1           | BAD93814.1        |                    |
| AtPIP1         | NM_118988.3          | NP_194575.2       | At4G28460          |
| AtPIP2         | NM_119892.2          | NP_568022.1       | At4G37290          |
| AtPIP3         | NM_127891.1          | NP_565549.1       | At2G23270          |
| AtPIPL2        | NM_111484.2          | NP_187260.1       | At3G06090          |
| AtPIPL3        | NM_119893.2          | NP_568023.1       | At4G37295          |
| AtPIPL4        | NM_001125892.1       | NP_001119364.1    | At5G43066          |
| AtPIPL5        | NM_001344469.1       | NP_001331732.1    | At5G43068          |
| GmCLV3a        | XM_006594862.2       | XP_006594925.1    | Glyma.13G313400.1  |
| GmIDA1a        | appended below       | appended below    | Glyma.10G205400.1  |
| GmIDA2a        | appended below       | appended below    | Glyma.01G090400.1  |
| GmIDA3a        | appended below       | appended below    | Glyma.04G215100.1  |
| GmIDA4a        | appended below       | appended below    | Glyma.05G189500.1  |
| GmIDA5a        | appended below       | appended below    | Glyma.20G165500.1  |
| GmIDA6a        | appended below       | appended below    | Glyma.16G170400.1  |
| HgCLE1         | FJ503004.1           | ACT32609.1        |                    |
| HgCLE2         | FJ503005.1           | ACT32610.1        |                    |
| HsCLE1         | HM588679.1           | AEA06591.1        |                    |
| HsCLE2         | HM588680.1           | AEA06592.1        |                    |
| HsCLEB         | KY124382.1           | AQR58088.1        |                    |
| MfIDL1         | appended below       | appended below    |                    |
| MhIDL1         | appended below       | appended below    |                    |
| Mi16D10        | AY134435.1           | AAN08582.1        |                    |
| MiIDL1         | KC237722.1           | AGF86396.1        |                    |
| MiIDL2         | appended below       | appended below    |                    |
| MiMAP1-V1      | AJ278663.1           | CAC27774.1        |                    |
| MiMAP1-V4      | AJ278663.1           | CAC27774.1        |                    |
| MiMAP1-V5      | AJ278663.1           | CAC27774.1        |                    |
| MiMAP1-V7      | AJ278663.1           | CAC27774.1        |                    |
| SiCLV3         | XM_010315155.2       | XP_010313457.1    | Solyc11g071380.1.1 |
| SiIDA1         | appended below       | appended below    | Solyc05g010000.1.1 |

|        |                |                |                    |
|--------|----------------|----------------|--------------------|
| SIIDA2 | appended below | appended below |                    |
| SIIDA3 | appended below | appended below |                    |
| SIIDA4 | appended below | appended below | Solyc07g044890.1.1 |
| SIIDA5 | appended below | appended below |                    |

---

Sequences which do not have an accession number at NCBI.

Nucleotide:

>GmIDA1a ORF

ATGGCCAATTCTCATTATTCTAAAACCTTGCATCTTCCATGCAAATCCTTCTCTATGGCT  
ATTCTCCTTGTGTTACTTGCTTCTTGTGGTTCTTGCCTGCAATAAGGACAGGCGCAACC  
ATGCGGTTGAATGAAGGCTCAGAACTTCTCCGGCGGAAGCAGCAACAACCGGATTTCTCCT  
TACAAAGGTCTTGTGTTTCAACTTCTTACCCAAAGGGGTGCCAATTCACCTTCAGGCCCT  
TCAAAGAGGCACAACCTCAGTGGTGGCTTCCACACCTAAGAATTGA

>GmIDA2a ORF

ATGGCAAATTACCATTCTTCTAAAACCTTGCATCTTCCATGCAAAACCTTATCTCTAGTT  
CTCCTTTTTGTTTACTTGCTACTTATTGGTTCTTGTGATGCAATAAGAATAGGCCAAACT  
ATGAAGCTGAATGAAACAAGAGAGATTCTCAAGAGAAAGCGCAATAACCAACATGGTTTT  
CCATACAAAAGCATGGTTTTCAACTTCTTCCCAAAGGGCCGGTGCCACCTTCAGGTCTC  
TCAAAGAGGCATAACGCAGTGGTGGATTCAACACCTAATAATTGA

>GmIDA3a ORF

ATGGTAGCTCTACGTAGTAGGAGACGTAAAACCTAATGCTCTTGCTGGTCTTGTGTTCTC  
TGCATATTGGGGCACGGTCATGGATCAAGAACCACCAACGCTTCAAATTGAAGCCAAAG  
TCTCAGCACACGGTCACTTTTTTGGATTCTTGCCAAAGAGGATACACATACCGTTCTCC  
TCTCCTTCAAAGAAACACAATGACATTGGCCTACAAAGTTGGAGATCACCCCTAA

>GmIDA4a ORF

ATGTTTTGTCATAGGAGACCTCTGATTCTAGTAATCATCTGGTTGTTCTTGTGTTCTCTTC  
ATATTGGGTCACTGCCATGGTTCTAGAGCCACAACAACCGTATTCAAATTCAAACCCAAA  
TCTCCACATCATGGTCACTTCTCTGGCTTCTTGCCAAAAGGATGCCTATAACCGTATTCA  
ACTCCTTCAAAGAAACACAATGACATTGGCTTAAGAAGTTGGAGATCACCCCTGA

>GmIDA5a ORF

ATGGATAGAAGATACCTCAACTTGGTTCCAGTGCTGATGCTTTTGGTAATATGTTTTGTT  
GGCCATAGTTATGGTCTAGACACTCTAATCAAGTTTTTCAAAGTGCAGCCCAGGGGAGAG  
GCTTTCCTCCTCAAGCTTCTTTGGTTTCTTGCCAAAAGCAATGCCAATACCACCTTCAGGG  
CCTTCAAGGAAACACAACGGCATTTGGATTACAAAGCTCAATGGGGGAACCATAG

>GmIDA6a ORF

ATGGGTAGAAGACATCTTCATGTATTGCCAATGCTGTTTTTGGCTGATTATATACTTGGTT  
GGTGCTAGTTATGGCTCTAGACACACTCAAGTGTCAATATTCAGCCCAAATCTCAAGGT  
TTACATCAAAATTTCTTTGGCTTCTTGCCAAAAGGCAATGCCATTCACCTTCAGGGCCT  
TCTAAGCAGCACAAACAGCATTCAATTACAAAACCTCAAGGGGAAACAACCATAG

>SlIDA1 ORF

ATGGCTTTCTCTTTTTCTTCTTCAAAAACCTTTATTTATCAAGCAAATTAACCTGTTTG  
ATACTTGTATTTCTCTACTTTTTAATTATGGTCATATTGTTGAAGCATCAAGATTTGGG  
AGAATTATGATGGTAGAGGAAAATCAAGAATATTTTCATCACAACATATGAAGGTATAC  
AAAAAAGAAAATGCATACAAAGTTGATAATTTATTTACTATGTTACAAAAGGGATT  
CCAATTCCTCTCTGCTCCATCAAAGAGACATAATGCTATTGAAGACTCTACACCTCAA  
AATTGA

>SlIDA2 ORF

ATGTTGAAAAAATCACAACACAACACTATTAATTTATTTACTTCTTGTGATTTTGGTG  
GTTGATCATCATGATCACCATGTTAATGCAGTAAAAAATCACAAGTTGTTAATGTTAAG

CCCTTATTACCTAGTAATAACAATTCTAAATCATCTTTTTCTCAATCTTTGCCAAAAGGA  
GTCCCTATTCCACCTTCTGCTCCTTCCAAAAGGCACAATCAAATCAATATATGA

>SlIDA3 ORF

ATGGAAAAAATGAGCATAAAAAACACAACACTACAATATCAATCATTTTTGTCTTGTGATA  
ATAATTCAACATGCTCATGGTGCAAGTCACACACAATTTTTCAAGGTGAAGCCTTTGCCA  
ATTAGTAATAAAAAACAATAAATCTCCTTATTATGAGTCTTTGCCAAAAGGAGTCCCAATT  
CCACCTTCTTCTCCTTCAAAAAGACACAATGGAATCAACCTCAAAGGTATTGGCCATGA

>SlIDA4 ORF

ATGGCTTATTCTGCTAATTCCAAAACCCTTATTATATTTCTCATGGAAATTCATATGC  
TTGATTCTCACACTATCTCTTGTCTTGACCATGGACATGGTACTACATGCCACCTACG  
CCGTCACGTATGCCGAGGCGTTTGAAGAGGAAGCTTCTAGAATGTTCTCAGAATTTCT  
GATGAAAAGAAAAGAGTTTCTCAGCAGTACTAGTAACCGGTTCCATATGCTACCAAAGGG  
ATTCTTATTCTCCTTCTGCACCATCAAAAAGGTGCAATTAA

>SlIDA5 ORF

ATGGCTTATTCTACTACTAATTATTCTTTCATGGAAATTCATGTACTTAATTCTCACATTA  
TCTCTTGTCTTGGCTATGCTTCTCAGTGAGAATATCGTCGACGATGAATTCAAAAGAT  
GAAGACGCTTATACACTATTTTCAGAACCATCTCCAAAATATGAAGACGCTTATACACTA  
TTTTCAGAATCATCTCCGAGATATTACGATGAAAATGAAAAGAAAAGAGTTTTCAAAGAGT  
AATTTGTTTCATATGCTACCAAAGGGACTCTAATTCCTCCTTCTGGACCATCACGTAGA  
CACAATGGAGATGGTACTTATCTAATTATCCTTAA

>MfIDL1 ORF

ATGTTTTATTCAATTAATAAATTTAATTAATTTAATTTAATTTAATGCTTTTTATCTGTC  
TCAATTGTGGATTCAATTAAGGAGTTCCACCTAATAGTGGACCATCACACAAAGGAAAT  
AAAGTTCCAGGTCCCGCCGATAG

>MhIDL1 ORF

ATGTTTTTTTCAATTAATAAATTTGTTTAAATTTAATTCCTCTGATTATTTAATGTTT  
TTGAATGTTTCTTCTGTTGTTGCTCCTAAAAACATTCCTGTTCTGCTAGTGGACCATCA  
AAGAGACACAATGGAATGGTCAAGATATAAGTAATTGA

>MiIDL1 ORF

ATGTTTTATTCAATTAATAAATTTAATTAATTTAATTTAATTTAATGCTTTTTATCTGTC  
TCAATTGTGGATTCAATTAAGGAGTTCCACCTAATAGTGGACCATCACGCAGAGGAAAT  
AAAGTTCCAGGTCCCGCCGATAG

>MiIDL2 ORF

ATGTTTTATTCAATTTAAAAATTTAATTAATTTAATTTAATTTAATGCTTTTTATCTGTC  
TCAATTGTGGATGCAGTTAAAGGAGTTCCACATAATAGTGCACCATCACGAAGAGGAAAT  
AAATTCCTCCAGGTCATCCAGGCTGA

Protein:

>GmIDA1a

MANSHYSKTLHLPLCKSFSMAILLVYLLLVGSCTAIRTGATMRLNEGSELLRRKQQQPRFP  
YKGLVFNFLPKGVPIPPSGPSKRHNSVAVSTPKN

>GmIDA2a

MANYHSSKSLHLPLCKTSLVLLFVYLLLVIGSCDAIRIGQTMKLNREILKRKRNNQHGF  
PYKSMVFNFFPKGPVPPSGPSKRHNAVVDSTPNN

>GmIDA3a

MVALRSRRRKTLMLLLVLFLCILGHGHSRRTTNVFKLKPKSQHTGHFFGFLPKRIHIPFS  
SPSKHNDIGLQSWRSP

>GmIDA4a

MVLHRRPLILVLIWLFILGHCHGSRATTTVFKFKPKSPHHGHFSGFLPKRMPIPYS  
TPSRKHNDIGLRSWRSP

>GmIDA5a

MDRRYLNLPVLMMLLVICFVGHSYGARHSNQVFKVQPRGEAFPPSFFGFLPKAMPIPPSG

PSRKHNGIGLQSSMGEP

>GmIDA6a

MGRRHLHVLPMFLFLIIYLVGASYGSRHTQVFNIQPKSQGLHQNFQFGLPKAMPLPPSGP  
SKQHNSIQLNQNSRGKQP

>SlIDA1

MAFSFSSSKTLYLSSKLTCLILVISLLFNIGHIVEASRFGRIMMVEENSRIFFSQHMKVY  
KKENAYKVDNLLFTMLPKGIPIPPSAPSKRHNAIEDSTPQN

>SlIDA2

MLKKNHNTTLLIYLLLVLVVDHHDHVNNAVKNSQVNVVKPLLPSNNNSKSSFSQSLPKG  
VPIPPSAPSKRHNQINI

>SlIDA3

MEKMSIKNTTTISIIFVLVIIIQHAHGASHTQFFKVKPLPISNKNKSPYYESLPKGVPI  
PPSSPSKRHNGINLKRYWP

>SlIDA4

MAYSANSKTLHYISSWKFIILTLVLDHGHGTTCPPTPSRMPRRLKEEASRMFSELS  
DEKKEFLSSTSNRFHMLPKGIPIPPSAPSKRCN

>SlIDA5

MAYSTTNYSSWKFMYLILTLVSLVLYASSVRISSTMNSKDEDAYTLFSESPKYEDAYTL  
FSESPRYYDENEKKEFQKSNLFHMLPKGTLIIPPSGPSRRHNGDGLSNYP

>MfIDL1

MFYSIKNLINLIIILMLLSVSVIVDSIKGVPPNSGPSHGKGNKVPGPGR

>MhIDL1

MFFSIKNLFKILIPLIILMFLNVSSVAPKNIPVPASGPSKRHNGNGQDISN

>MiIDL1

MFYSIKNLINLIIILMLLSVSVIVDSIKGVPPNSGPSRRGNKVPGPGR

>MiIDL2

MFYSFKNLINLIIILMLLSVSVIVDAVKGVPHNSAPSRRGNKFPFGHPG
