# Supplementary material for: The root-knot nematode Meloidogyne incognita produces a functional mimic of the Arabidopsis INFLORESCENCE DEFICIENT IN ABSCISSION signaling peptide
Source: PubMed Central journal article supplement (PMC5972575; doi:10.1093/jxb/ery135), 2018-04-10
Supplement: ery135_suppl_supplementary-table_s2.pdf [file ery135_suppl_supplementary-table_s2.pdf]

**Supplementary Table S2.** Primers for qPCR and construct preparation.

| <b>Name</b>         | <b>Sequence</b>                             | <b>Description</b>                            |
|---------------------|---------------------------------------------|-----------------------------------------------|
| AtACT2-F            | TCCCTCAGCACATTCCAGCAGAT                     | AtACT2 constitutive expression for qPCR       |
| AtACT2-R            | AACGATTCCTGGACCTGCCTCATC                    | AtACT2 constitutive expression for qPCR       |
| MiEF1b-f1           | GGAAGTGATGAATCCGATGATGAGG                   | MiEF1b constitutive expression for qPCR       |
| MiEF1b-r1           | TTTGGCAATAACTCCAGGCTTTTTAG                  | MiEF1b constitutive expression for qPCR       |
| MiIDA-f2            | TGCTTTTATCTGTCTCAATTGTGGA                   | MiIDL1 qPCR                                   |
| MiIDA-r2            | AATCTATCGGCCGGGACCTG                        | MiIDL1 qPCR                                   |
| MiIDL2-f1           | TCTGTCTCAATTGTGGATGCAG                      | MiIDL2 qPCR                                   |
| MiIDL2-r1           | ATCAATCAGCCTGGATGACCTGGAGG                  | MiIDL2 qPCR                                   |
| GUS_RNAi-f1         | CTCCTACCGTACCTCGCATTAC                      | GUS qPCR                                      |
| GUS_RNAi-r1         | CGCTTCGAAACCAATGCCTAAAG                     | GUS qPCR                                      |
| KAN1                | CTGTCATCTCACCTTGCTCC                        | NPTII qPCR                                    |
| KAN2                | GCCAAGCTCTTCAGCAATATC                       | NPTII qPCR                                    |
| MiIDL1-F1N          | CCGctcgagAAAATGTTTTATTCAATTAAAAATTTAATTAATT | Full-length MiIDL1 overexpression construct   |
| MiIDL1-R1N          | GCtctagaCTATCGGCCGGGACCTGGAA                | Full-length MiIDL1 overexpression construct   |
| MiSpIDL1-F1N        | CCGctcgagAAAATGATTAAGGAGTTCCACCTAATAGTG     | No Signal Pep MiIDL1 overexpression construct |
| MiSpIDL1-R1N        | GCtctagaCTATCGGCCGGGACCTGGAACTTTA           | No Signal Pep MiIDL1 overexpression construct |
| GUS_RNAi_XBA_f1     | ACAAACtctagaACTTTACTGGCTTTGGTCGTC           | GUS RNAi construct                            |
| GUS_RNAi_HIND_r1    | CCACATaagcttGCTTGGGTGGTTTTTGTAC             | GUS RNAi construct                            |
| GUS_RNAi_XHO_f1     | ACAAACctcgagACTTTACTGGCTTTGGTCGTC           | GUS RNAi construct                            |
| GUS_RNAi_ECOR_r1    | CCACATgaattcGCTTGGGTGGTTTTTGTAC             | GUS RNAi construct                            |
| MiIDL1_RNAi_XBA_f1  | AATTTtctagaAGACATACCGCCAAAAATGTTTTATTC      | MiIDL1 RNAi construct                         |
| MiIDL1_RNAi_HIND_r1 | TTTTTTaagcttCCTTTATATATTTATTCCAAAAATTACTAA  | MiIDL1 RNAi construct                         |
| MiIDL1_RNAi_XHO_f1  | AATTTctcgagAGACATACCGCCAAAAATGTTTTATTC      | MiIDL1 RNAi construct                         |
| MiIDL1_RNAi_ECOR_r1 | TTTTTTgaattcCCTTTATATATTTATTCCAAAAATTACTAA  | MiIDL1 RNAi construct                         |
